# Supplementary material for: Comparative yields of antimicrobial peptides released from human and cow milk proteins under infant digestion conditions predicted by in silico methodology
Source: Royal Society of Chemistry journal article supplement (doi:10.1039/d3fo00748k), 2023-01-01
Supplement: d3fo00748k1.pdf [file d3fo00748k1.pdf]

## SUPPORTING INFORMATION

**Table S1.** Proportions (% by number) of AMPs from individual proteins released by simulated infant digestion, of absorbing ( $\leq 10$  AAs) and non-absorbing ( $>10$  AAs) fractions.

| <b>Protein type</b>    | <b>Total AMPs per total peptides (%)</b> | <b>Absorbing AMPs per total peptides (%)</b> | <b>Non-absorbing AMPs per total peptides (%)</b> |
|------------------------|------------------------------------------|----------------------------------------------|--------------------------------------------------|
| <b>Human</b>           |                                          |                                              |                                                  |
| $\alpha$ -S1-casein    | 11.54                                    | 7.69                                         | 3.85                                             |
| $\beta$ -casein        | 13.04                                    | 8.70                                         | 4.35                                             |
| $\kappa$ -casein       | 9.09                                     | 4.55                                         | 4.55                                             |
| $\alpha$ -lactalbumin  | 17.39                                    | 13.04                                        | 4.35                                             |
| Albumin                | 9.01                                     | 8.11                                         | 0.90                                             |
| Lactoferrin            | 2.65                                     | 1.77                                         | 0.88                                             |
|                        |                                          |                                              |                                                  |
| <b>Bovine</b>          |                                          |                                              |                                                  |
| $\alpha$ -S1-casein    | 15.38                                    | 11.54                                        | 3.85                                             |
| $\beta$ -casein        | 19.05                                    | 14.29                                        | 4.76                                             |
| $\alpha$ -S2-casein    | 4.88                                     | 4.88                                         | 0.00                                             |
| $\kappa$ -casein       | 9.09                                     | 4.55                                         | 4.55                                             |
| $\beta$ -lactoglobulin | 14.29                                    | 9.52                                         | 4.76                                             |
| $\alpha$ -lactalbumin  | 9.09                                     | 4.55                                         | 4.55                                             |
| Albumin                | 7.14                                     | 7.14                                         | 0.00                                             |
| Lactoferrin            | 6.25                                     | 5.36                                         | 0.89                                             |

**Table S2.** Estimated concentrations of total absorbing ( $\leq 10$  AAs) and total non-absorbing ( $> 10$  AAs) AMPs in human, cow and 'humanised' cow milk.

| <b>Milk type</b>     | <b>Total absorbing AMPs<br/>(g/L)</b> | <b>Total non-absorbing AMPs<br/>(g/L)</b> | <b>Total AMPs<br/>(g/L)</b> |
|----------------------|---------------------------------------|-------------------------------------------|-----------------------------|
| human milk           | 0.53                                  | 0.52                                      | 1.05                        |
| cow milk             | 2.18                                  | 1.82                                      | 4.00                        |
| 'humanised' cow milk | 0.69                                  | 0.75                                      | 1.44                        |
