# Supplementary material for: Comparative yields of antimicrobial peptides released from human and cow milk proteins under infant digestion conditions predicted by in silico methodology
Source: Royal Society of Chemistry journal article supplement (doi:10.1039/d3fo00748k), 2023-01-01
Supplement: d3fo00748k2.xlsx [file d3fo00748k2.xlsx]

## Sheet: human milk proteins
Accession Number	Protein	Length
P47710	Alpha-S1-Casein	185
P05814	Beta-casein	226
P07498	Kappa-Casein	182
P00709	Alpha-lactalbumin	142
P02768	Albumin	609
P02788	Lactoferrin	710

## Sheet: h-aS1Cn
Alpha-S1-casein from human milk
All peptides and AAs generated by PeptideCutter with trypsin and chymotrypsin-high specificity					Peptides (>=4AAs) predicted as AMPs by CAMPR3-RF
Resulting peptide sequence	Peptide length [aa]	Peptide mass [Da]			Resulting peptide sequence	Peptide length [aa]	Peptide mass [Da]	Predicted by CAMPR3-RF	AMP Probability
MR	2	305.395			LLILTCLVAVALARPK	16	1694.19	AMP	0.8835
LLILTCLVAVALARPK	16	1694.19			LPLR	4	497.638	AMP	0.5115
LPLR	4	497.638			YPER	4	563.611	AMP	0.5995
YPER	4	563.611
LQNPSESSEPIPLESR	16	1782.92
EEY	3	439.422
MNGMNR	6	721.847
QR	2	302.333
NILR	4	514.625
EK	2	275.305
QTDEIK	6	732.789
DTR	3	390.396
NESTQNCVVAEPEK	14	1547.66
MESSISSSSEEMSLSK	16	1718.87
CAEQF	5	596.656
CR	2	277.342
LNEY	4	537.57
NQLQLQAAHAQEQIR	15	1747.93
R	1	174.203
MNENSHVQVPF	11	1301.44
QQLNQLAAYPY	11	1308.46
AVW	3	374.44
Y	1	181.191
YPQIMQY	7	942.097
VPFPPF	6	702.851
SDISNPTAHENY	12	1347.36
EK	2	275.305
NNVMLQW	7	904.051

## Sheet: h-beta-Cn
beta-casein from human milk
All peptides and AAs generated by PeptideCutter with trypsin and chymotrypsin-high specificity					Peptides (>=4AAs) predicted as AMPs by CAMPR3-RF
Resulting peptide sequence	Peptide length [aa]	Peptide mass [Da]			Resulting peptide sequence	Peptide length [aa]	Peptide mass [Da]	Predicted by CAMPR3-RF	AMP Probability
MK	2	277.382			VLILACLVALALAR	14	1438.88	AMP	0.735
VLILACLVALALAR	14	1438.88			VEPIPY	6	716.832	AMP	0.512
ETIESLSSSEESITEY	16	1803.85			DTVY	4	496.518	AMP	0.548
K	1	146.189
QK	2	274.32
VEK	3	374.437
VK	2	245.322
HEDQQQGEDEHQDK	14	1722.66
IYPSF	5	625.722
QPQPLIYPF	9	1102.3
VEPIPY	6	716.832
GF	2	222.244
LPQNILPLAQPAVVLPVPQPEIMEVPK	27	2931.57
AK	2	217.268
DTVY	4	496.518
TK	2	247.294
GR	2	231.255
VMPVLK	6	685.923
SPTIPF	6	660.768
F	1	165.192
DPQIPK	6	696.801
LTDLENLHLPLPLLQPLMQQVPQPIPQTLALPPQPLW	37	4204.04
SVPQPK	6	654.764
VLPIPQQVVPYPQR	14	1633.95
AVPVQALLLNQELLLNPTHQIYPVTQPLAPVHNPISV	37	4038.75

## Sheet: h-kappa-Cn
Kappa-Casein from human milk
All peptides and AAs generated by PeptideCutter with trypsin and chymotrypsin-high specificity					Peptides (>=4AAs) predicted as AMPs by CAMPR3-RF
Resulting peptide sequence	Peptide length [aa]	Peptide mass [Da]			Resulting peptide sequence	Peptide length [aa]	Peptide mass [Da]	Predicted by CAMPR3-RF	AMP Probability
MK	2	277.382			LLVVNALALTLPF	13	1383.74	AMP	0.715
SF	2	252.27			IAIPPK	6	637.82	AMP	0.509
LLVVNALALTLPF	13	1383.74
LAVEVQNQK	9	1028.17
QPACHENDERPF	12	1442.53
Y	1	181.191
QK	2	274.32
TAPY	4	450.492
VPMY	4	508.633
Y	1	181.191
VPNSYPY	7	838.915
Y	1	181.191
GTNLY	5	566.611
QR	2	302.333
RPAIAINNPY	10	1128.3
VPR	3	370.452
TY	2	282.296
Y	1	181.191
ANPAVVRPHAQIPQR	15	1653.91
QY	2	309.322
LPNSHPPTVVR	11	1216.41
RPNLHPSF	8	967.095
IAIPPK	6	637.82
K	1	146.189
IQDK	4	502.568
IIIPTINTIATVEPTPAPATEPTVDSVVTPEAF	33	3405.89
SESIITSTPETTTVAVTPPTA	21	2103.31

## Sheet: h-aLa
Alpha-lactalbumin from human milk
All peptides and AAs generated by PeptideCutter with trypsin and chymotrypsin-high specificity					Peptides (>=4AAs) predicted as AMPs by CAMPR3-RF
Resulting peptide sequence	Peptide length [aa]	Peptide mass [Da]			Resulting peptide sequence	Peptide length [aa]	Peptide mass [Da]	Predicted by CAMPR3-RF	AMP Probability
MR	2	305.395			VPLF	4	474.601	AMP	0.546
F	1	165.192			LVGILFPAILAK	12	1254.62	AMP	0.8785
F	1	165.192			DIDGY	5	581.58	AMP	0.5945
VPLF	4	474.601			LAHK	4	467.569	AMP	0.509
LVGILFPAILAK	12	1254.62
QF	2	293.323
TK	2	247.294
CELSQLLK	8	933.131
DIDGY	5	581.58
GGIALPELICTMF	13	1364.68
HTSGY	5	563.568
DTQAIVENNESTEY	14	1612.62
GLF	3	335.403
QISNK	5	588.661
LW	2	317.388
CK	2	249.328
SSQVPQSR	8	887.948
NICDISCDK	9	1010.14
F	1	165.192
LDDDITDDIMCAK	13	1467.63
K	1	146.189
ILDIK	5	600.756
GIDY	4	466.491
W	1	204.228
LAHK	4	467.569
ALCTEK	6	663.787
LEQW	4	574.634
LCEK	4	491.603
L	1	131.175

## Sheet: h-albumin
Albumin from human milk
All peptides and AAs generated by PeptideCutter with trypsin and chymotrypsin-high specificity					Peptides (>=4AAs) predicted as AMPs by CAMPR3-RF
Resulting peptide sequence	Peptide length [aa]	Peptide mass [Da]			Resulting peptide sequence	Peptide length [aa]	Peptide mass [Da]	Predicted by CAMPR3-RF	AMP Probability
MK	2	277.382			DAHK	4	469.498	AMP	0.585
W	1	204.228			QEPER	5	657.681	AMP	0.6315
VTF	3	365.43			DDNPNLPR	8	939.98	AMP	0.5125
ISLLF	5	591.748			APELLF	6	688.822	AMP	0.5015
LF	2	278.351			DEGK	4	447.445	AMP	0.545
SSAY	4	426.426			RHPDY	5	686.725	AMP	0.6295
SR	2	261.281			LSVVLNQLCVLHEK	14	1594.93	AMP	0.526
GVF	3	321.376			TPVSDR	6	673.724	AMP	0.511
R	1	174.203			HKPK	4	508.621	AMP	0.509
R	1	174.203			ADDK	4	447.445	AMP	0.545
DAHK	4	469.498
SEVAHR	6	697.749
F	1	165.192
K	1	146.189
DLGEENF	7	822.827
K	1	146.189
ALVLIAF	7	745.96
AQY	3	380.401
LQQCPF	6	734.868
EDHVK	5	626.667
LVNEVTEF	8	950.056
AK	2	217.268
TCVADESAENCDK	13	1384.45
SLHTLF	6	716.835
GDK	3	318.33
LCTVATLR	8	876.082
ETY	3	411.412
GEMADCCAK	9	927.073
QEPER	5	657.681
NECF	4	511.55
LQHK	4	524.621
DDNPNLPR	8	939.98
LVRPEVDVMCTAF	13	1479.77
HDNEETF	7	890.861
LK	2	259.349
K	1	146.189
Y	1	181.191
LY	2	294.351
EIAR	4	487.556
RHPY	4	571.637
F	1	165.192
Y	1	181.191
APELLF	6	688.822
F	1	165.192
AK	2	217.268
R	1	174.203
Y	1	181.191
K	1	146.189
AAF	3	307.349
TECCQAADK	9	968.064
AACLLPK	7	714.921
LDELR	5	644.726
DEGK	4	447.445
ASSAK	5	462.503
QR	2	302.333
LK	2	259.349
CASLQK	6	648.775
F	1	165.192
GER	3	360.37
AF	2	236.271
K	1	146.189
AW	2	275.307
AVAR	4	415.493
LSQR	4	502.571
FPK	3	390.483
AEF	3	365.386
AEVSK	5	532.594
LVTDLTK	7	788.94
VHTECCHGDLLECADDR	17	1916.09
ADLAK	5	516.595
Y	1	181.191
ICENQDSISSK	11	1223.32
LK	2	259.349
ECCEKPLLEK	10	1191.42
SHCIAEVENDEMPADLPSLAADF	23	2474.7
VESK	4	461.516
DVCK	4	463.549
NY	2	295.295
AEAK	4	417.462
DVF	3	379.413
LGMF	4	466.596
LY	2	294.351
EY	2	310.307
AR	2	245.282
RHPDY	5	686.725
SVVLLLR	7	799.024
LAK	3	330.428
TY	2	282.296
ETTLEK	6	719.79
CCAAADPHECY	11	1182.31
AK	2	217.268
VF	2	264.324
DEF	3	409.396
KPLVEEPQNLIK	12	1407.67
QNCELF	6	752.84
EQLGEY	6	737.764
K	1	146.189
F	1	165.192
QNALLVR	7	812.967
Y	1	181.191
TK	2	247.294
K	1	146.189
VPQVSTPTLVEVSR	14	1511.74
NLGK	4	430.504
VGSK	4	389.452
CCKHPEAK	8	915.093
R	1	174.203
MPCAEDY	7	827.922
LSVVLNQLCVLHEK	14	1594.93
TPVSDR	6	673.724
VTK	3	346.427
CCTESLVNR	9	1024.17
RPCF	4	521.635
SALEVDETY	9	1026.07
VPK	3	342.439
EF	2	294.307
NAETF	5	580.595
TF	2	266.297
HADICTLSEK	10	1116.25
ER	2	303.318
QIK	3	387.479
K	1	146.189
QTALVELVK	9	1000.2
HKPK	4	508.621
ATK	3	318.373
EQLK	4	516.595
AVMDDF	6	696.773
AAF	3	307.349
VEK	3	374.437
CCK	3	352.467
ADDK	4	447.445
ETCF	4	498.551
AEEGK	5	532.551
K	1	146.189
LVAASQAALGL	11	1013.2

## Sheet: h-Lf
Lactoferrin from human milk
All peptides and AAs generated by PeptideCutter with trypsin and chymotrypsin-high specificity					Peptides (>=4AAs) predicted as AMPs by CAMPR3-RF
Resulting peptide sequence	Peptide length [aa]	Peptide mass [Da]			Resulting peptide sequence	Peptide length [aa]	Peptide mass [Da]	Predicted by CAMPR3-RF	AMP Probability
MK	2	277.382			LGALGLCLAGR	11	1043.29	AMP	0.509
LVF	3	377.484			ESTVF	5	581.623	AMP	0.5415
LVLLF	5	603.803			LAVAVVR	7	726.918	AMP	0.509
LGALGLCLAGR	11	1043.29
RR	2	330.39
SVQW	4	518.57
CAVSQPEATK	10	1033.16
CF	2	268.331
QW	2	332.359
QR	2	302.333
NMR	3	419.499
K	1	146.189
VR	2	273.335
GPPVSCIK	8	799.984
R	1	174.203
DSPIQCIQAIAENR	14	1557.74
ADAVTLDGGF	10	965.028
IY	2	294.351
EAGLAPY	7	719.792
K	1	146.189
LRPVAAEVY	9	1017.19
GTER	4	461.475
QPR	3	399.45
THY	3	419.437
Y	1	181.191
AVAVVK	6	585.745
K	1	146.189
GGSF	4	366.374
QLNELQGLK	9	1042.2
SCHTGLR	7	772.877
R	1	174.203
TAGW	4	433.464
NVPIGTLRPF	10	1113.33
LNW	3	431.492
TGPPEPIEAAVAR	13	1307.47
F	1	165.192
F	1	165.192
SASCVPGADK	10	934.032
GQFPNLCR	8	934.081
LCAGTGENK	9	891.995
CAF	3	339.409
SSQEPY	6	709.711
F	1	165.192
SY	2	268.269
SGAF	4	380.401
K	1	146.189
CLR	3	390.501
DGAGDVAF	8	750.763
IR	2	287.362
ESTVF	5	581.623
EDLSDEAER	9	1063.04
DEY	3	425.395
ELLCPDNTR	9	1060.19
KPVDK	5	585.701
F	1	165.192
K	1	146.189
DCHLAR	6	713.809
VPSHAVVAR	9	935.094
SVNGK	5	503.556
EDAIW	5	632.671
NLLR	4	514.625
QAQEK	5	602.645
F	1	165.192
GK	2	203.241
DK	2	261.278
SPK	3	330.384
F	1	165.192
QLF	3	406.482
GSPSGQK	7	659.697
DLLF	4	506.599
K	1	146.189
DSAIGF	6	608.649
SR	2	261.281
VPPR	4	467.569
IDSGLY	6	666.729
LGSGY	5	495.533
F	1	165.192
TAIQNLR	7	814.94
K	1	146.189
SEEEVAAR	8	889.918
R	1	174.203
AR	2	245.282
VVW	3	402.494
CAVGEQELR	9	1004.13
K	1	146.189
CNQW	4	549.602
SGLSEGSVTCSSASTTEDCIALVLK	25	2458.74
GEADAMSLDGGY	12	1185.23
VY	2	280.324
TAGK	4	375.425
CGLVPVLAENY	11	1177.38
K	1	146.189
SQQSSDPDPNCVDRPVEGY	19	2093.17
LAVAVVR	7	726.918
R	1	174.203
SDTSLTW	7	808.843
NSVK	4	446.504
GK	2	203.241
K	1	146.189
SCHTAVDR	8	887.966
TAGW	4	433.464
NIPMGLLF	8	904.135
NQTGSCK	7	736.798
F	1	165.192
DEY	3	425.395
F	1	165.192
SQSCAPGSDPR	11	1104.16
SNLCALCIGDEQGENK	16	1693.86
CVPNSNER	8	917.992
Y	1	181.191
Y	1	181.191
GY	2	238.243
TGAF	4	394.428
R	1	174.203
CLAENAGDVAF	11	1109.22
VK	2	245.322
DVTVLQNTDGNNNEAW	16	1789.83
AK	2	217.268
DLK	3	374.437
LADF	4	464.519
ALLCLDGK	8	832.026
R	1	174.203
KPVTEAR	7	799.926
SCHLAMAPNHAVVSR	15	1592.85
MDK	3	392.471
VER	3	402.451
LK	2	259.349
QVLLHQQAK	9	1064.25
F	1	165.192
GR	2	231.255
NGSDCPDK	8	834.856
F	1	165.192
CLF	3	381.49
QSETK	5	591.619
NLLF	4	505.614
NDNTECLAR	9	1035.1
LHGK	4	453.542
TTY	3	383.401
EK	2	275.305
Y	1	181.191
LGPQY	5	576.65
VAGITNLK	8	814.98
K	1	146.189
CSTSPLLEACEF	12	1299.48
LR	2	287.362
K	1	146.189

## Sheet: cow milk proteins
Accession number	Protein	Length
P02662	Alpha-S1-casein	214
P02666	Beta-casein	224
P02668	Kappa-casein	190
P02663	Alpha-S2-casein	222
P02754	beta-lactoglobulin	178
P00711	Alpha-lactalbumin	142
P02769	Albumin	607
P24627	Lactotransferrin	708

## Sheet: c-aS1Cn
aS1Cn
All peptides and AAs generated by PeptideCutter with trypsin and chymotrypsin-high specificity					Peptides (>=4AAs) predicted as AMPs by CAMPR3-RF
Resulting peptide sequence	Peptide length [aa]	Peptide mass [Da]			Resulting peptide sequence	Peptide length [aa]	Peptide mass [Da]	Predicted by CAMPR3-RF	AMP Probability
MK	2	277.382			LLILTCLVAVALARPK	16	1694.19	AMP	0.8835
LLILTCLVAVALARPK	16	1694.19			YPELF	5	667.759	AMP	0.5215
HPIK	4	493.607			TDAPSF	6	636.659	AMP	0.5085
HQGLPQEVLNENLLR	15	1759.98			TTMPLW	6	747.907	AMP	0.5275
F	1	165.192
F	1	165.192
VAPFPEVF	8	905.061
GK	2	203.241
EK	2	275.305
VNELSK	6	688.779
DIGSESTEDQAMEDIK	16	1767.84
QMEAESISSSEEIVPNSVEQK	21	2321.49
HIQK	4	524.621
EDVPSER	7	830.85
Y	1	181.191
LGY	3	351.403
LEQLLR	6	770.927
LK	2	259.349
K	1	146.189
Y	1	181.191
K	1	146.189
VPQLEIVPNSAEER	14	1580.76
LHSMK	5	614.761
EGIHAQQK	8	909.997
EPMIGVNQELAY	12	1363.55
F	1	165.192
YPELF	5	667.759
R	1	174.203
QF	2	293.323
Y	1	181.191
QLDAYPSGAW	10	1107.19
Y	1	181.191
Y	1	181.191
VPLGTQY	7	776.888
TDAPSF	6	636.659
SDIPNPIGSENSEK	14	1486.56
TTMPLW	6	747.907

## Sheet: c-bCn
Beta-casein from cow milk
All peptides and AAs generated by PeptideCutter with trypsin and chymotrypsin-high specificity					Peptides (>=4AAs) predicted as AMPs by CAMPR3-RF
Resulting peptide sequence	Peptide length [aa]	Peptide mass [Da]			Resulting peptide sequence	Peptide length [aa]	Peptide mass [Da]	Predicted by CAMPR3-RF	AMP Probability
MK	2	277.382			VLILACLVALALAR	14	1438.88	AMP	0.735
VLILACLVALALAR	14	1438.88			EAMAPK	6	645.772	AMP	0.56
ELEELNVPGEIVESLSSSEESITR	24	2646.84			EMPFPK	6	747.907	AMP	0.571
INK	3	373.453			DMPIQAF	7	820.959	AMP	0.5075
K	1	146.189
IEK	3	388.464
F	1	165.192
QSEEQQQTEDELQDK	15	1834.83
IHPF	4	512.609
AQTQSLVYPFPGPIPNSLPQNIPPLTQTPVVVPPF	35	3755.37
LQPEVMGVSK	10	1087.3
VK	2	245.322
EAMAPK	6	645.772
HK	2	283.33
EMPFPK	6	747.907
YPVEPF	6	750.849
TESQSLTLTDVENLHLPLPLLQSWMHQPHQPLPPTVMFPPQSVLSLSQSK	50	5629.49
VLPVPQK	7	779.978
AVPYPQR	7	829.954
DMPIQAF	7	820.959
LLY	3	407.51
QEPVLGPVR	9	994.159
GPFPIIV	7	741.929

[truncated: 6 more sheets: c-kCn, c-aS2Cn, c-bLg, c-aLa, c-albumin, c-Lf]
